# Supplementary material for: Cross-sectional study on exercise-related skin complaints among sports students at two German universities
Source: PubMed Central journal article supplement (PMC11116371; doi:10.1038/s41598-024-62357-9), 2024-05-23
Supplement: 41598_2024_62357_MOESM1_ESM.pdf [file 41598_2024_62357_MOESM1_ESM.pdf]

## Questionnaire on sports-associated skin complaints (sports dermatoses)

The skin is the body's largest organ and forms its outer protective covering. It is sometimes subjected to heavy strain during sport. Although the epidermis renews itself about once a month, there is a risk of wear and tear if it is chronically overstressed locally.

This questionnaire serves to record the skin care needs of students who are active in sport. The survey is part of a scientific research project that aims to develop solutions for sports-related skin complaints. The study is being conducted by Prof. Apfelbacher (Medical Sociology, University of Regensburg) in collaboration with Dr. Kreuzpointner (TU Munich). Your data and information will be treated confidentially and will only be scientifically evaluated in anonymized form.

The questionnaire is divided into three parts:

In part A, we would like to know to what extent sports-associated skin complaints restrict you in training or in competition situations.

Part B is about your approach to sports-related skin complaints.

Part C relates to your general skin situation and skin care.

There are different types of questions in this questionnaire. Please mark the answer that applies to you for closed questions and enter free text for open questions.

Please answer the questionnaire as completely as possible!

### Screening questions

Do you exercise at least 3 times a week?

Do you do at least 6 hours of sport per week?

What type of sport do you mainly do during this time?

### Part A. Restrictions due to sports-related skin complaints

1. Do you have the impression that your skin is particularly stressed by your sporting activities? (manifested e.g. in blisters, redness, dryness, rashes etc.)

- Yes  No

2. Do you have the impression that your skin reacts more sensitively to your sporting activities?

- Yes  No

*If you answered "No" to both question 1 and question 2, please skip the questions in parts A and B and continue with part C.*

3. 3. what sports-related skin complaints have you had in the last 12 months? This refers to all skin problems that occurred during or in connection with sport, including blisters, calluses, wounds, etc. (multiple choice possible).

- |                               |                                                                                   |
|-------------------------------|-----------------------------------------------------------------------------------|
| <input type="radio"/> Dryness | <input type="radio"/> Hypersensitivity to previously well-tolerated care products |
| <input type="radio"/> Redness | <input type="radio"/> Rash                                                        |
| <input type="radio"/> Itching | <input type="radio"/> Dandruff on the head                                        |
| <input type="radio"/> Pain    | <input type="radio"/> Dandruff on the body                                        |
| <input type="radio"/> Burning |                                                                                   |

- Cracking
- Blistering
- Wheals
- Softened skin
- Callus formation
- Chafing
- Fungal diseases
- Bacterial skin infections
- Hair loss on the body (e.g. due to rubbing of sports clothing or equipment))
- .....

4. Which parts of the skin are affected and to what extent?

|                        | Strong | Medium | Low | Not at all |
|------------------------|--------|--------|-----|------------|
| Hands/palms            |        |        |     |            |
| Arms/shoulders         |        |        |     |            |
| Feet/soles             |        |        |     |            |
| Legs/hips              |        |        |     |            |
| Head/neck              |        |        |     |            |
| Chest/nipples          |        |        |     |            |
| Abdomen                |        |        |     |            |
| Back                   |        |        |     |            |
| Buttocks/intimate area |        |        |     |            |

5. Do the skin complaints affect your training frequency?  
 Yes, very much     Yes, a little     No

6. Do the skin complaints affect your training intensity?  
 Yes, very much     Yes, a little     No

7. Do you have the impression that your performance during training is limited by the skin complaints?  
 Yes, very much     Yes, a little     No

8. Are you dissatisfied with your training performance because of the skin complaints?  
 Yes     No

9. How often do you take relieving postures because of the skin complaints?  
 Very often     Often     Soemtimes     Never

10. Do you prepare your skin for competitions in a special way?  
 Yes     No     I do not participate in competitions

|  |                                            |
|--|--------------------------------------------|
|  | If yes, how do you prepare it? (free text) |
|  |                                            |

11. Do the skin complaints have a negative impact on your performance in competitions?  
 Yes     No     I do not participate in competitions

12. How important is an intact skin for your athletic performance?  
 Very important     Important     Less important     Not important

**Part B. Your approach to sports-related skin complaints**

13. Have you already done anything about your skin complaints? (e.g. use of a skin care product, change of sportswear, tapes, etc.)

- Yes  No

*If you answered "No" to question 13, please skip the remaining questions in Part B and continue with Part C.*

14. How have you treated the skin complaints so far and have they improved as a result? (Please tick the appropriate box)

|                                                           | Improved | Remained the same | Deteriorated | Not attempted |
|-----------------------------------------------------------|----------|-------------------|--------------|---------------|
| Application of a beauty product from the drugstore        |          |                   |              |               |
| Application of an over the counter pharmaceutical product |          |                   |              |               |
| Application of a drug after medical advice                |          |                   |              |               |
| Application of bandages, tapes, etc.                      |          |                   |              |               |
| Change of a currently used care product                   |          |                   |              |               |
| Change of sportswear                                      |          |                   |              |               |
| Change of sports equipment                                |          |                   |              |               |
| Other, namely:                                            |          |                   |              |               |

15. If you use cosmetic products or medical skin care, which products do you use for which skin areas? (Free text in table form)

Have your skin complaints improved as a result? (Please tick)

| Product name/description | Skin area | Strongly improved | Somewhat improved | Remained the same | Deteriorated |
|--------------------------|-----------|-------------------|-------------------|-------------------|--------------|
|                          |           |                   |                   |                   |              |
|                          |           |                   |                   |                   |              |
|                          |           |                   |                   |                   |              |
|                          |           |                   |                   |                   |              |

16. Has the treatment of your skin complaints improved your overall athletic performance?

- Yes, very  Yes, somewhat  No

17. Were there any negative effects when using a skincare product in sport?

- Yes  No

|  |                                |
|--|--------------------------------|
|  | If yes, which one? (free text) |
|--|--------------------------------|

|                                                                                                                       |                                                                                                   |
|-----------------------------------------------------------------------------------------------------------------------|---------------------------------------------------------------------------------------------------|
|                                                                                                                       |                                                                                                   |
| 18. Do you feel uncomfortable applying skincare products in front of others?                                          |                                                                                                   |
| <input type="radio"/> Yes <input type="radio"/> No <input type="radio"/> Depends on product                           |                                                                                                   |
| <b>Part C. General skin condition and skin care</b>                                                                   |                                                                                                   |
| 19. Do you have any issues with your skin in general (not sports related)?                                            |                                                                                                   |
| <input type="radio"/> Yes <input type="radio"/> No                                                                    |                                                                                                   |
|                                                                                                                       | If yes, how often do the complaints occur?                                                        |
|                                                                                                                       | <input type="radio"/> Occasionally <input type="radio"/> Permanently                              |
|                                                                                                                       | If yes, how long have the complaints been present?                                                |
|                                                                                                                       | <input type="radio"/> Childhood <input type="radio"/> Adolescence <input type="radio"/> Adulthood |
| 20. Has a doctor ever diagnosed you with a skin disease?                                                              |                                                                                                   |
| <input type="radio"/> Yes <input type="radio"/> No                                                                    |                                                                                                   |
|                                                                                                                       | If yes, which one? (free text)                                                                    |
| 21. Which cleaning and skin care products do you generally use in connection with your sporting activity? (free text) |                                                                                                   |
|                                                                                                                       |                                                                                                   |
|                                                                                                                       |                                                                                                   |
| 22. Sex:                                                                                                              |                                                                                                   |
| <input type="radio"/> Female <input type="radio"/> Male                                                               |                                                                                                   |
| 23. Age:                                                                                                              |                                                                                                   |
|                                                                                                                       |                                                                                                   |
| 24. Aimed degree                                                                                                      |                                                                                                   |
| <input type="radio"/> Bachelor <input type="radio"/> Master <input type="radio"/> State exam                          |                                                                                                   |
| 25. Study programme                                                                                                   |                                                                                                   |
|                                                                                                                       |                                                                                                   |
| 26. Semester:                                                                                                         |                                                                                                   |
|                                                                                                                       |                                                                                                   |
| 27. Main Sport:                                                                                                       |                                                                                                   |
|                                                                                                                       |                                                                                                   |
| 28. What other sports do you play?                                                                                    |                                                                                                   |
|                                                                                                                       |                                                                                                   |
| 29. How many hours of sport do you do on average per week?                                                            |                                                                                                   |
|                                                                                                                       |                                                                                                   |
| 30. Have you taken part in any competitions in the last 24 months?                                                    |                                                                                                   |
| <input type="radio"/> Yes <input type="radio"/> No                                                                    |                                                                                                   |

31. What sporting successes have you had in the last 24 months? (e.g. ran a marathon, won a medal at a competition, etc.)

Thank you very much for answering the questionnaire!  
You have been a great help to us.
